# Supplementary material
Source: PubMed Central journal article supplement (PMC5005449)
Supplement: mmc1.pdf [file mmc1.pdf]

**The American Journal of Human Genetics, Volume 99**

## **Supplemental Data**

### **Human Y Chromosome Haplogroup N: A Non-trivial Time-Resolved Phylogeography that Cuts across Language Families**

**Anne-Mai Ilumäe, Maere Reidla, Marina Chukhryaeva, Mari Järve, Helen Post, Monika Karmin, Lauri Saag, Anastasiya Agdzhoyan, Alena Kushniarevich, Sergey Litvinov, Natalya Ekomasova, Kristiina Tambets, Ene Metspalu, Rita Khusainova, Bayazit Yunusbayev, Elza K. Khusnutdinova, Ludmila P. Osipova, Sardana Fedorova, Olga Utevska, Sergey Koshel, Elena Balanovska, Doron M. Behar, Oleg Balanovsky, Toomas Kivisild, Peter A. Underhill, Richard Villems, and Siiri Rootsi**

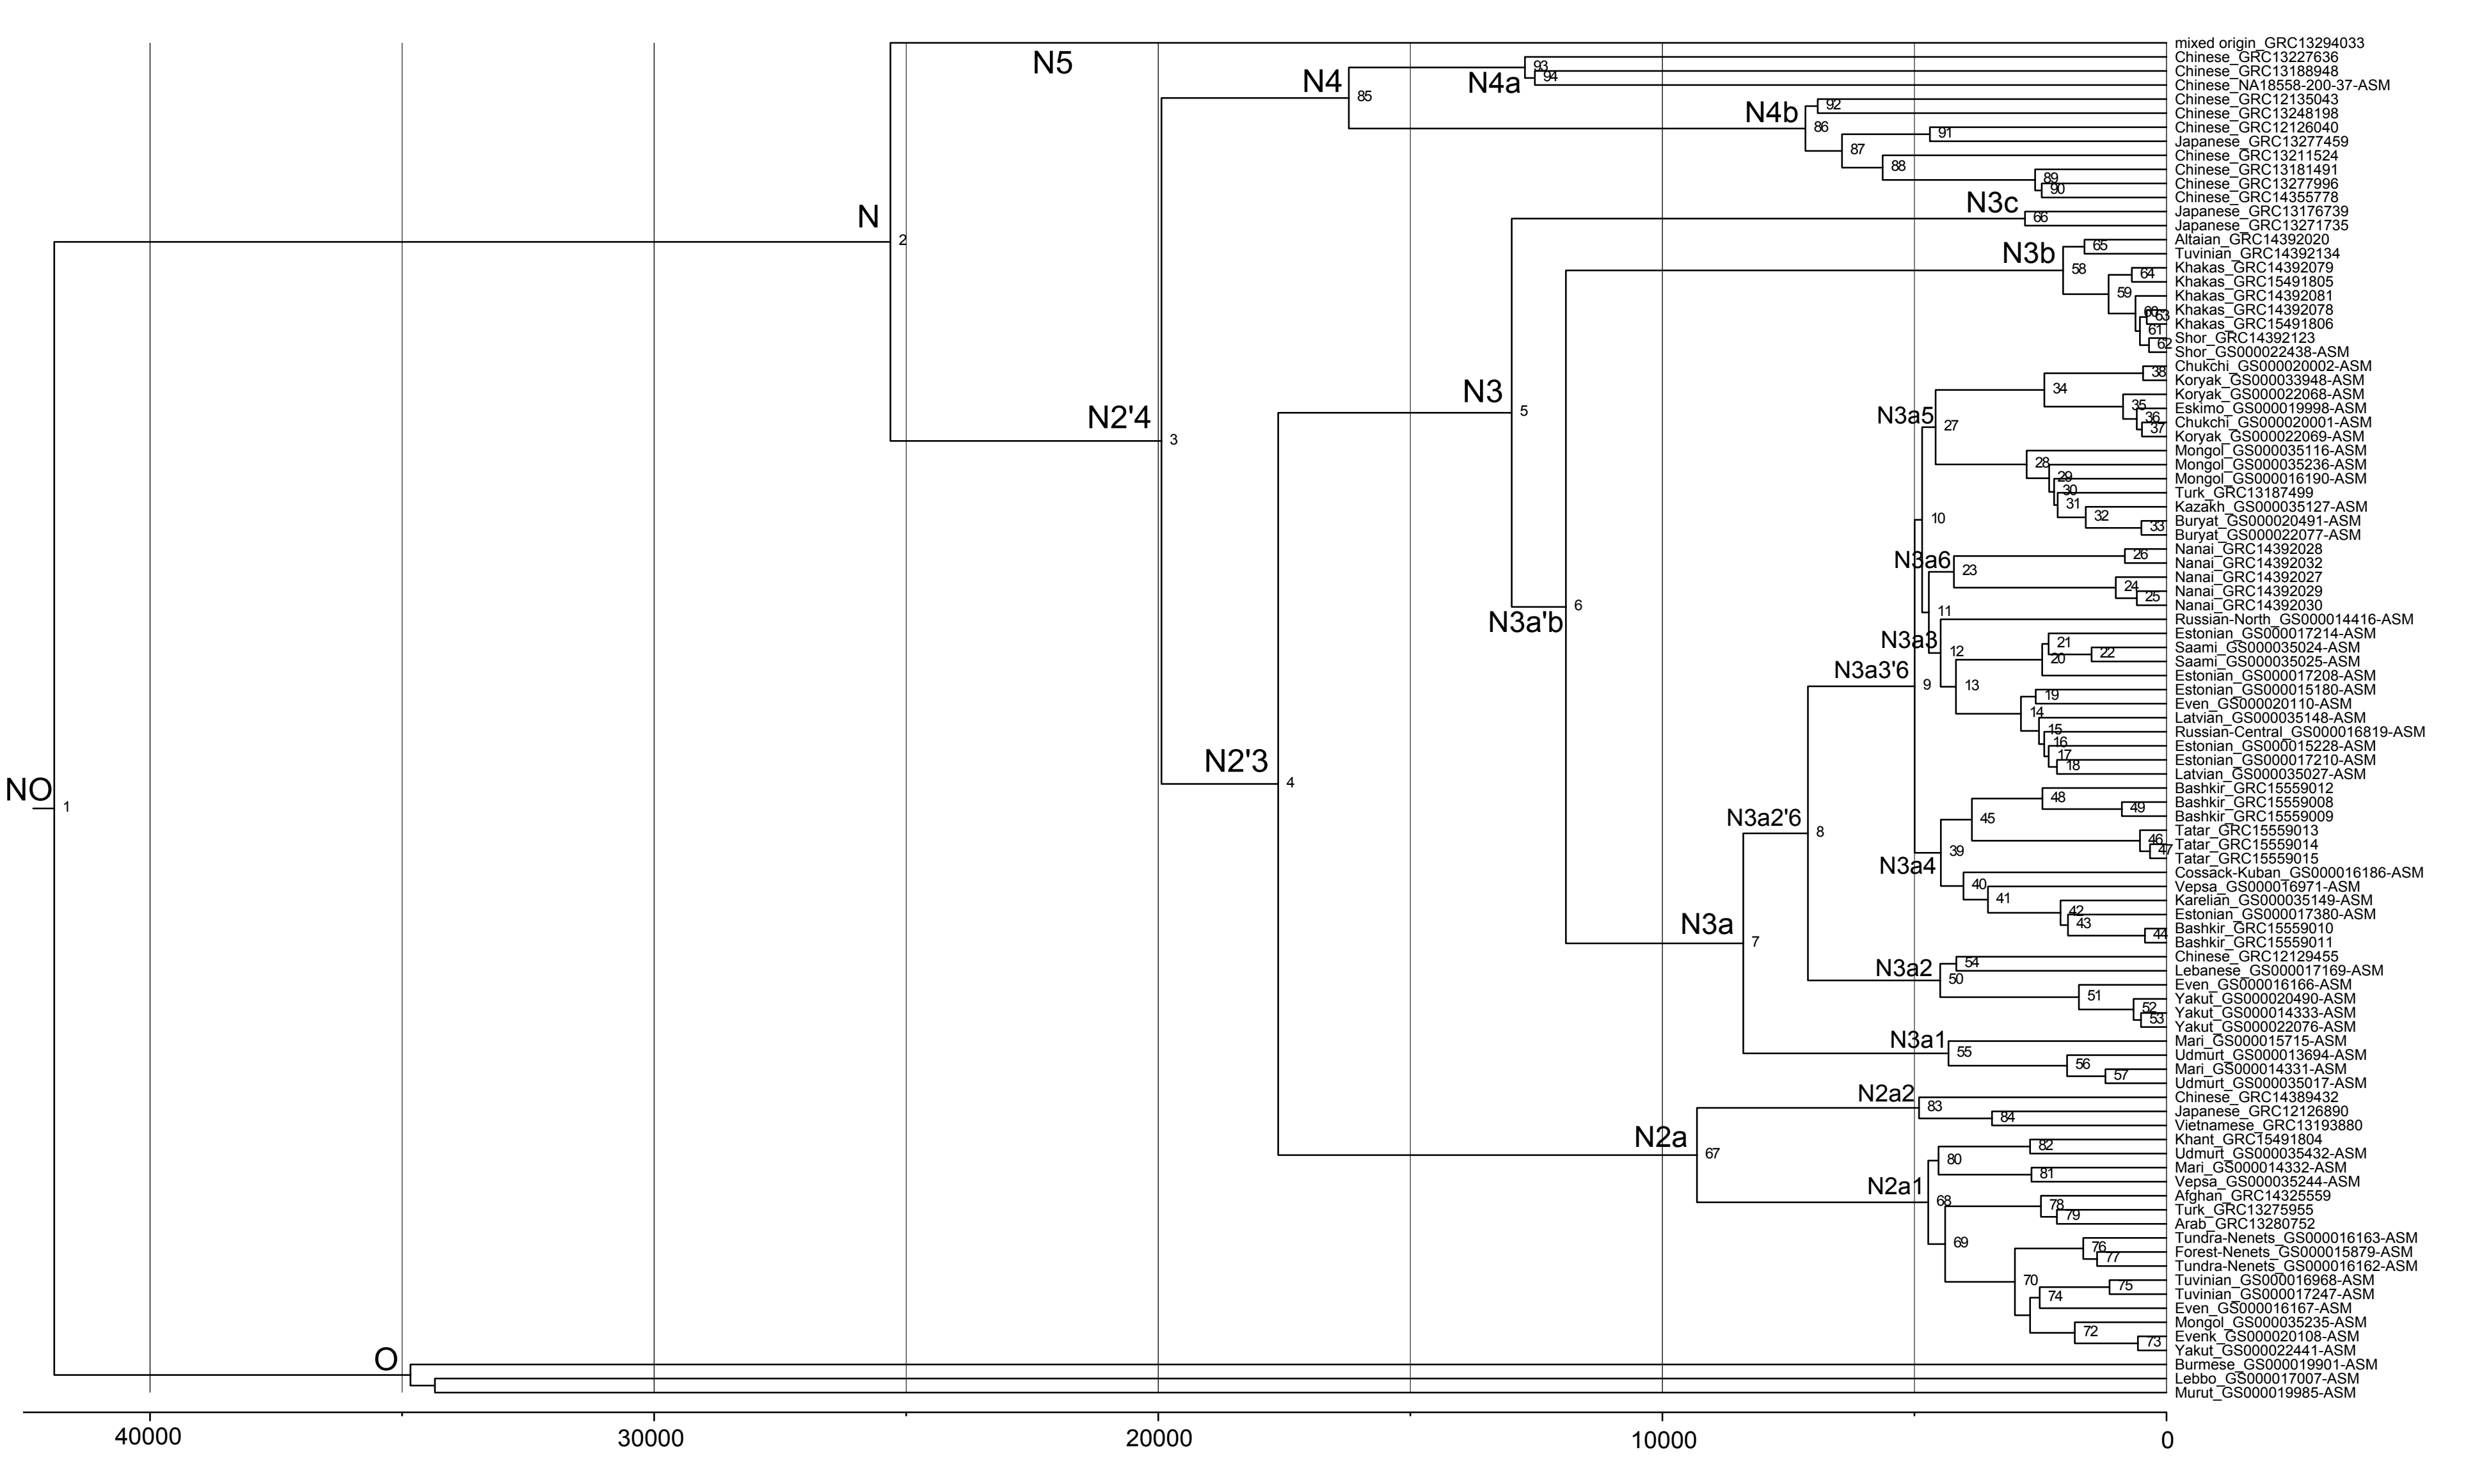

N5

N4

N4a

N4b

N3c

N3b

N3

N3a5

N2'4

N3a6

N3a'b

N3a3

N3a3'6

N2'3

N3a2'6

N3a

N3a2

N3a1

N2a2

N2a

N2a1

N

O

40000

30000

20000

10000

0

NO

1

mixed origin\_GRC13294033  
Chinese\_GRC13227636  
Chinese\_GRC13188948  
Chinese\_NA18558-200-37-ASM  
Chinese\_GRC12135043  
Chinese\_GRC13248198  
Chinese\_GRC12126040  
Japanese\_GRC13277459  
Chinese\_GRC13211524  
Chinese\_GRC13181491  
Chinese\_GRC13277996  
Chinese\_GRC14355778  
Japanese\_GRC13176739  
Japanese\_GRC13271735  
Altaiian\_GRC14392020  
Tuvianian\_GRC14392134  
Khakas\_GRC14392079  
Khakas\_GRC15491805  
Khakas\_GRC14392081  
Khakas\_GRC14392078  
Khakas\_GRC15491806  
Shor\_GRC14392123  
Shor\_GS000022438-ASM  
Chukchi\_GS000020002-ASM  
Koryak\_GS000033948-ASM  
Koryak\_GS000022068-ASM  
Eskimo\_GS000019998-ASM  
Chukchi\_GS000020001-ASM  
Koryak\_GS000022069-ASM  
Mongol\_GS000035116-ASM  
Mongol\_GS000035236-ASM  
Mongol\_GS000016190-ASM  
Turk\_GRC13187499  
Kazakh\_GS000035127-ASM  
Buryat\_GS000020491-ASM  
Buryat\_GS000022077-ASM  
Nanai\_GRC14392028  
Nanai\_GRC14392032  
Nanai\_GRC14392027  
Nanai\_GRC14392029  
Nanai\_GRC14392030  
Russian-North\_GS000014416-ASM  
Estonian\_GS000017214-ASM  
Saami\_GS000035024-ASM  
Saami\_GS000035025-ASM  
Estonian\_GS000017208-ASM  
Estonian\_GS000015180-ASM  
Even\_GS000020110-ASM  
Latvian\_GS000035148-ASM  
Russian-Central\_GS000016819-ASM  
Estonian\_GS000015228-ASM  
Estonian\_GS000017210-ASM  
Latvian\_GS000035027-ASM  
Bashkir\_GRC15559012  
Bashkir\_GRC15559008  
Bashkir\_GRC15559009  
Tatar\_GRC15559013  
Tatar\_GRC15559014  
Tatar\_GRC15559015  
Cossack-Kuban\_GS000016186-ASM  
Vepsa\_GS000016971-ASM  
Karelian\_GS000035149-ASM  
Estonian\_GS000017380-ASM  
Bashkir\_GRC15559010  
Bashkir\_GRC15559011  
Chinese\_GRC12129455  
Lebanese\_GS000017169-ASM  
Even\_GS000016166-ASM  
Yakut\_GS000020490-ASM  
Yakut\_GS000014333-ASM  
Yakut\_GS000022076-ASM  
Mari\_GS000015715-ASM  
Udmurt\_GS000013694-ASM  
Mari\_GS000014331-ASM  
Udmurt\_GS000035017-ASM  
Chinese\_GRC14389432  
Japanese\_GRC12126890  
Vietnamese\_GRC13193880  
Khant\_GRC15491804  
Udmurt\_GS000035432-ASM  
Mari\_GS000014332-ASM  
Vepsa\_GS000035244-ASM  
Afghan\_GRC14325559  
Turk\_GRC13275955  
Arab\_GRC13280752  
Tundra-Nenets\_GS000016163-ASM  
Forest-Nenets\_GS000015879-ASM  
Tundra-Nenets\_GS000016162-ASM  
Tuvianian\_GS000016968-ASM  
Tuvianian\_GS000017247-ASM  
Even\_GS000016167-ASM  
Mongol\_GS000035235-ASM  
Evenk\_GS000020108-ASM  
Yakut\_GS000022441-ASM  
Burmese\_GS000019901-ASM  
Lebbo\_GS000017007-ASM  
Murut\_GS000019985-ASM

**Figure S1:** Detailed phylogenetic tree of Y-chromosome haplogroup N based on 97 high coverage sequences.

The calibrated tree was constructed using BEAST v1.7.5. Internal node numbers and sample ID-labels on the tips are indicated. Age estimates of hg N clades are reported in Table S5. Number of mutations and marker names are presented in Table S2. All SNPs characterizing the clades (nodes) are presented in Table S6.





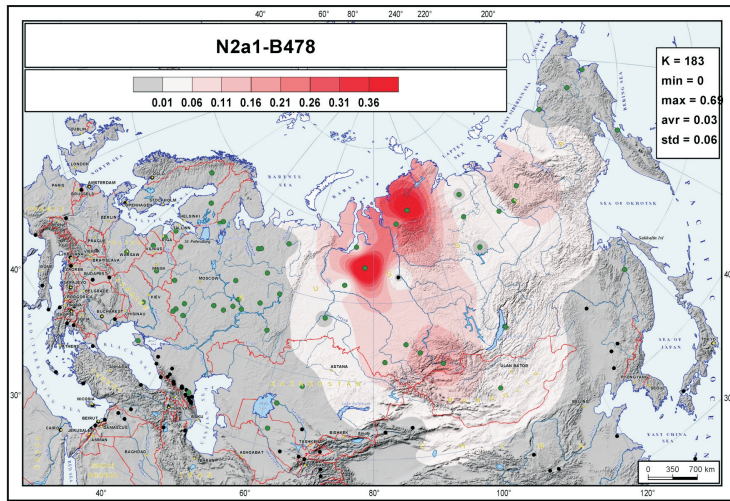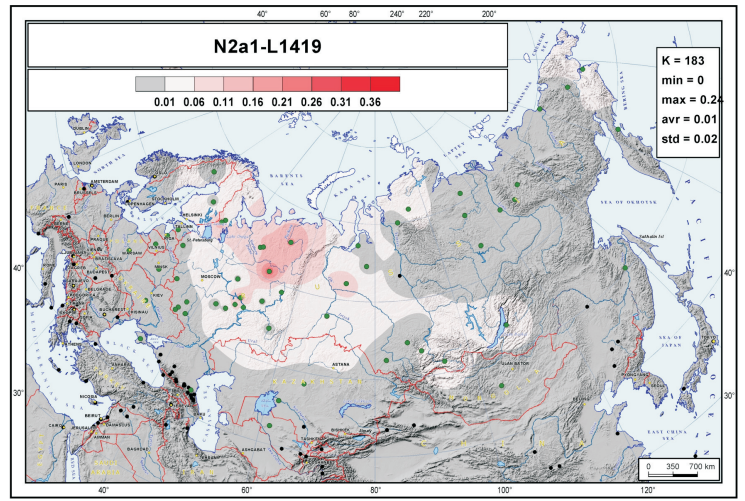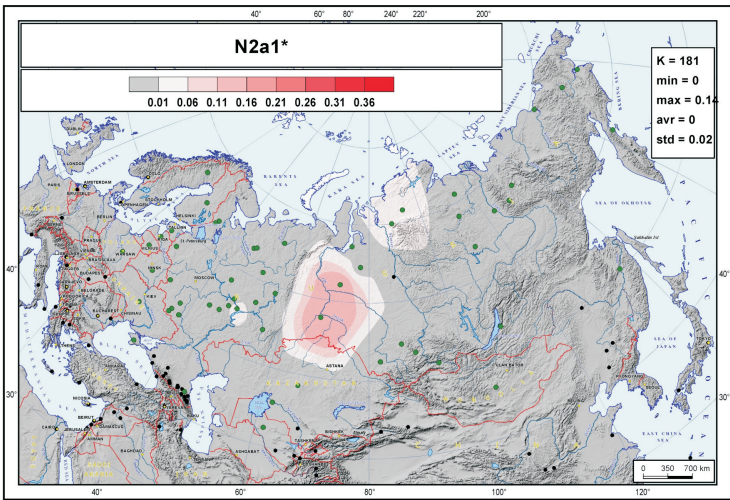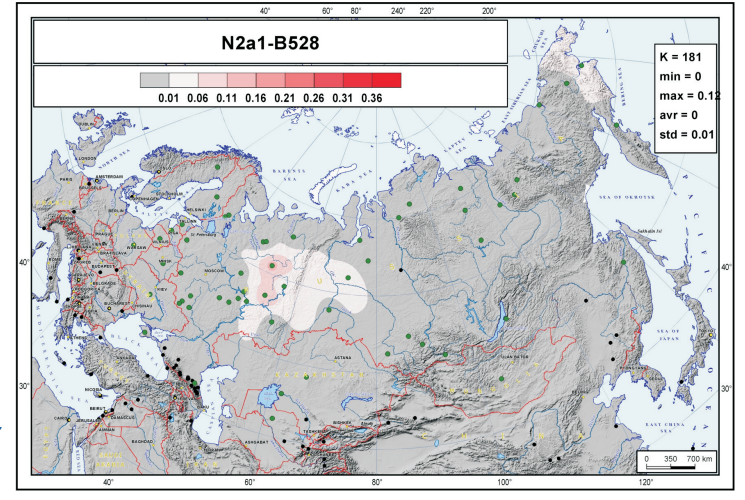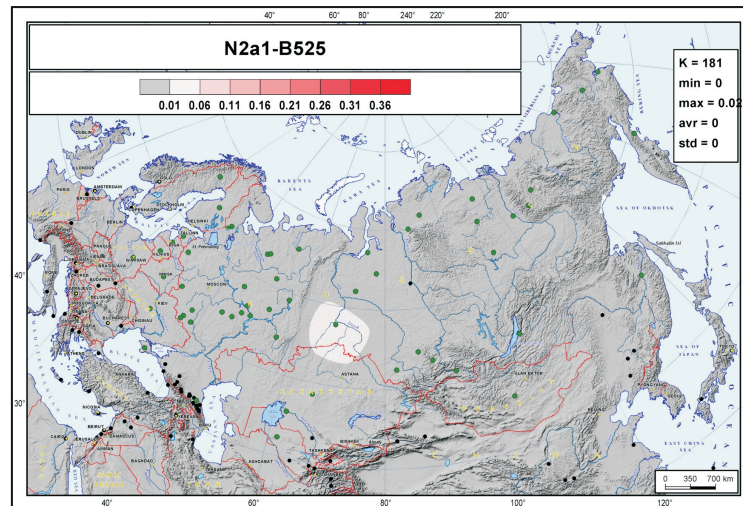

Figure S3. Geographic distribution maps of N2a1 sub-clades in studied regions. Data points from Table S2 and additional datapoints with zero frequency values from literature were used for creating the plots. Datapoints from this study are indicated by green dots and datapoints from literature with smaller black dots.

Panel A

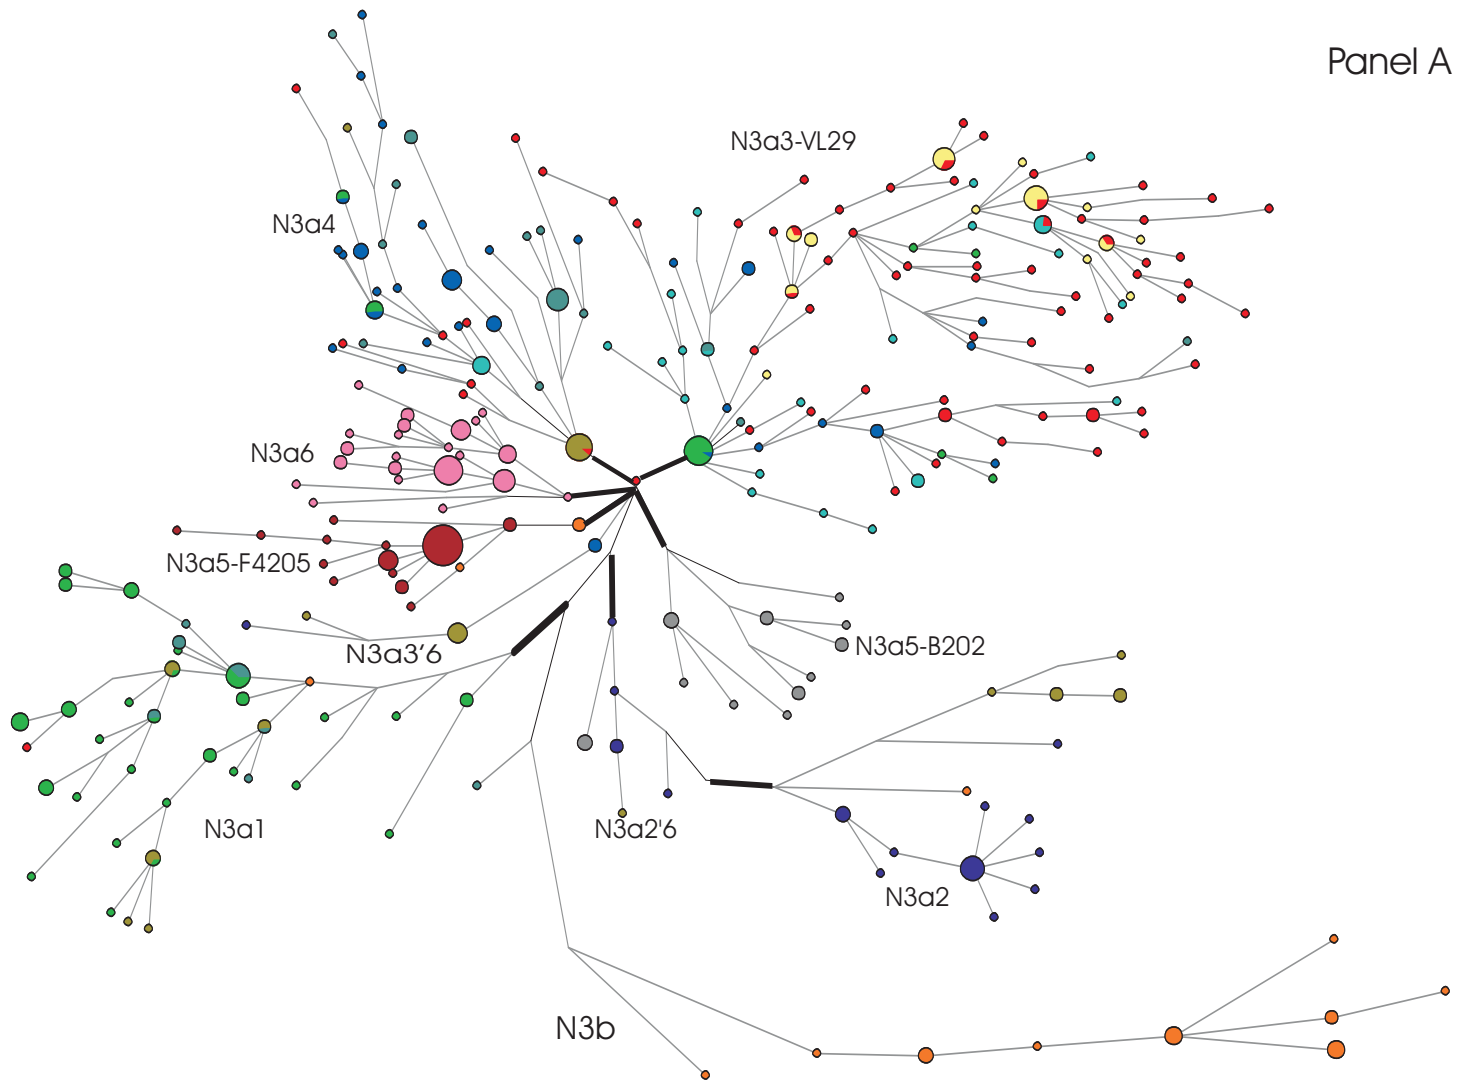

Geography

- Baltic (Estonians)
- Baltic (Lithuanians)
- Northeastern Europe
- Eastern Slavs
- VUR Uralic
- VUR Turkic
- Western Siberia
- Central Siberia
- Southern Siberia
- Northeastern Siberia
- Mongolia/Transbaikal
- Amur region

Panel B

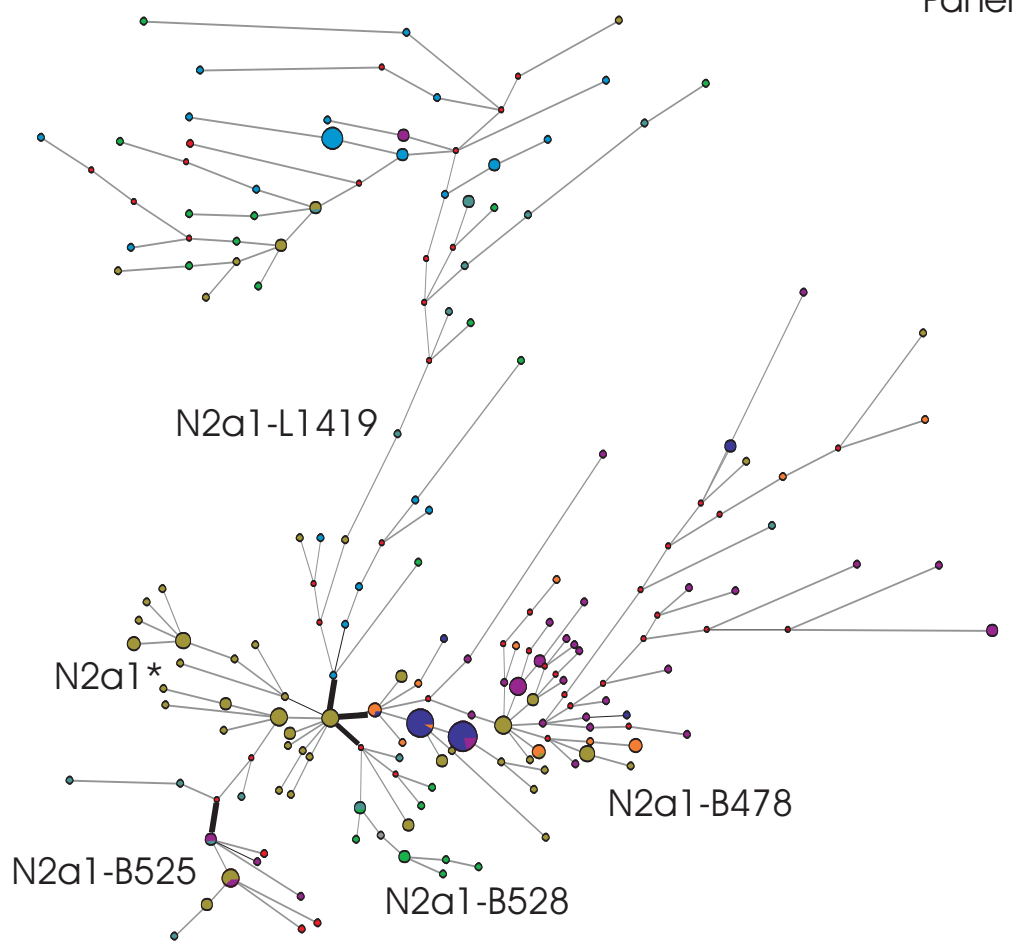

**Figure S4.** Networks of N3 and N2a1 STR haplotypes.

**Panel A)** N3 haplotypes network based on 14 STRs.

Network of 438 samples from the N3 sub-clade (data in Supplementary Table 5). The network combines bi-allelic markers (indicated with thick black lines) defining sub-clades within hg N3 with 16 STR loci (DYS19, DYS389I, DYS389b, DYS390, DYS391, DYS392, DYS393, DYS439, DYS437, DYS438, DYS448, DYS456, DYS458, YGATAH4). Datasets are typed with different kits, the overlapping 14 STRs are used for network construction. Circles represent microsatellite haplotypes, the areas of the circles and sectors are proportional to haplotype frequency (the smallest circle corresponds to one individual). The colors indicate groups consisting of the following populations: Baltic region - Uralic-speaking Estonians and Indo-European speaking Lithuanians; Northeastern Europe - Karelians, Vepsas, Northern Russians; Eastern Slavs - Belarusians, Central and South Russians, Ukrainians; populations from Volga-Uralic regions (VUR) are grouped by language - Uralic-speakers (Udmurts, Komis, Maris, Mordvas) and Turkic-speakers (Bashkirs, Chuvashes, Tatars); Western Siberia is represented by Khanties; Central Siberian populations - Yakuts, Evenks, Evens, Yukaghirs; Southern Siberian populations - Tuvans, Altaians, Shors, Khakasses; Northeastern Siberian populations - Koryaks, Eskimos and Chukchis; Amur region is represented by the Nanais.

**Panel B)** N2a1 haplotypes network based on 15 STRs.

Network of 233 samples from the N2a1 sub-clades (data in Supplementary Table 5). The network combines bi-allelic markers (indicated with thick black lines) defining sub-clades within hg N2a1 with 17 STR loci (DYS19, DYS389I, DYS389b, DYS390, DYS391, DYS392, DYS393, DYS439, DYS437, DYS438, DYS448, DYS456, DYS458, DYS635, YGATAH4). Datasets are typed with different kits, the overlapping 15 STRs are used for network construction. Circles represent microsatellite haplotypes, the areas of the circles and sectors are proportional to haplotype frequency (smallest circle corresponds to one individual). The colors indicate groups consisting of the following populations: Northeastern European region - Karelians, Vepsas, Northern Russians; Eastern Slavs - Belarusians, Central and Southern Russians; populations from Volga-Uralic regions (VUR) are grouped by language - Uralic-speakers (Udmurts, Komis, Maris) and Turkic-speakers (Bashkirs, Chuvashes, Tatars); Western Siberia is represented by Khanties; Central Siberian populations - Yakuts, Evenks, Evens, Yukaghirs; Southern Siberian populations - Tuvans, Altaians, Shors, Khakasses; Northeastern Siberian populations - Koryaks, Eskimos and Chukchis; Amur region is represented by the Nanais.

**A**

PC2 (15.7%)

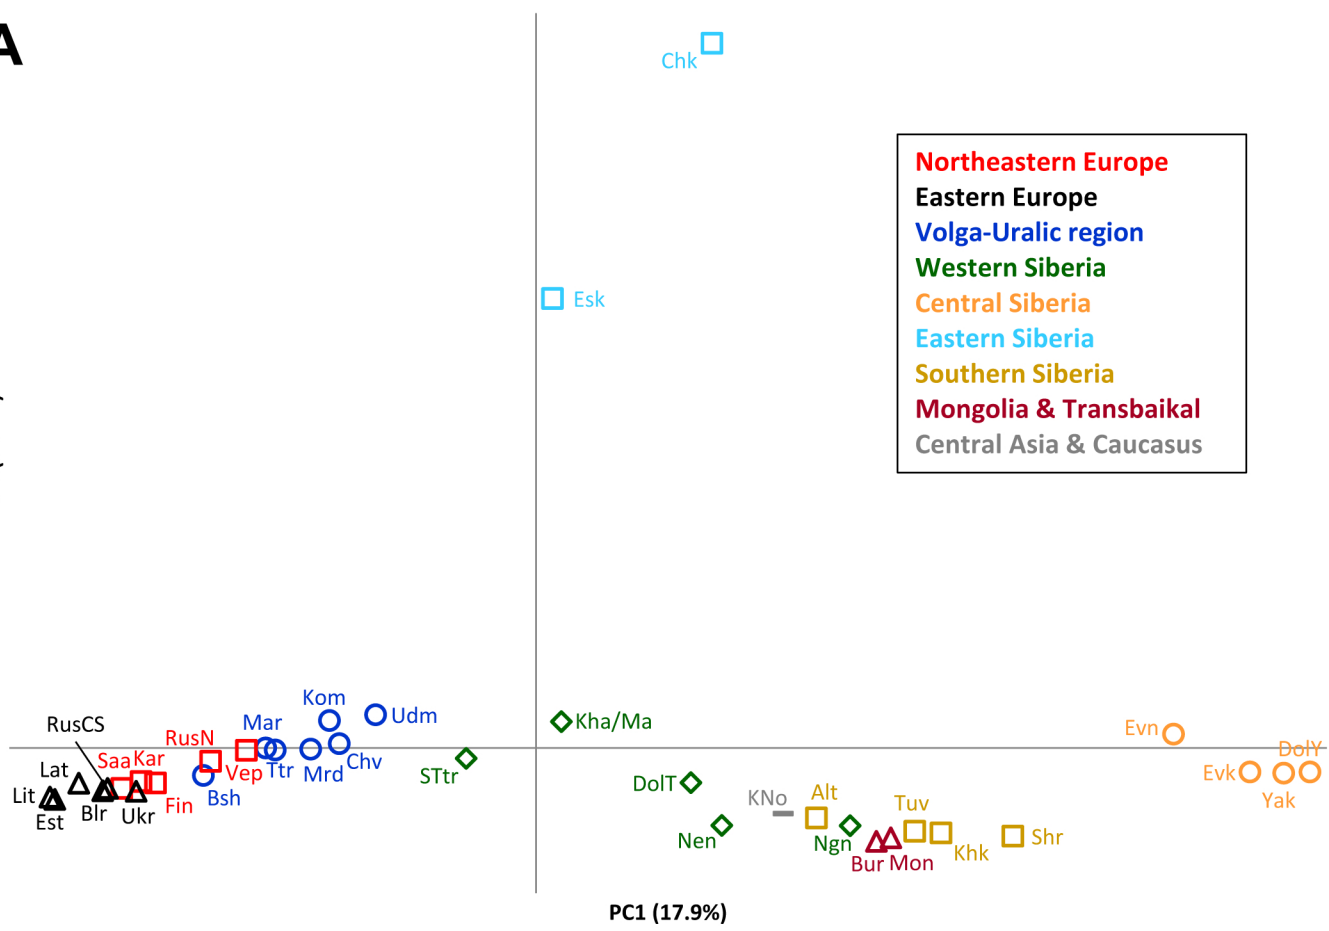**B**

PC2 (15.7%)

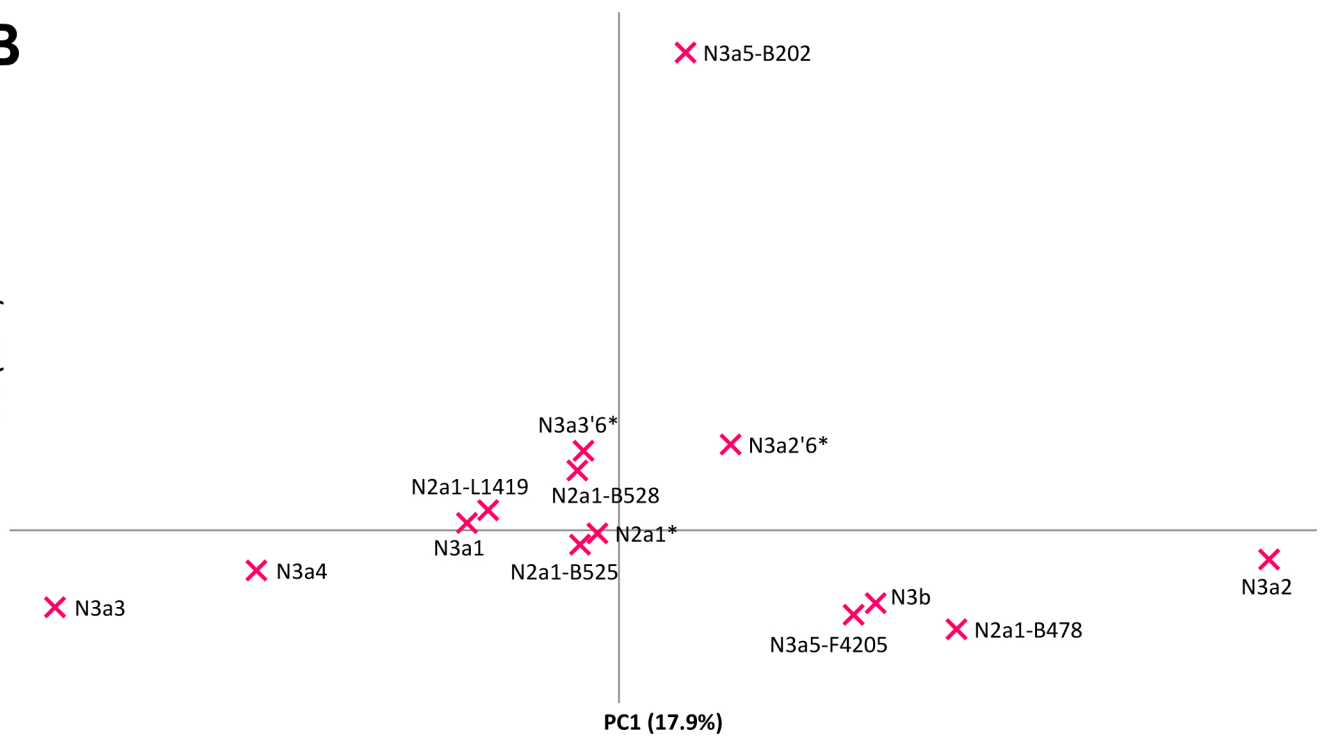

## **Figure S5**

### **A. PC plot of the populations based on N2a1 and N3 sub-haplogroup frequencies relative to total hg N.**

Colors correspond to the geographic regions of Figure 1. The codes of the populations included in PCA are given in Table S2, populations with fewer than 5 hg N Y-chromosomes or hg N frequency  $<5\%$  were excluded. All sampled Nanai belong to the sub-hg N3a6, not found in any other population, and were therefore excluded. In cases where several populations were pooled for PCA, they are denoted by the same code in Table S2.

### **B. PC plot of N2a and N3 sub-haplogroups based on their frequencies in the populations relative to total hg N.**



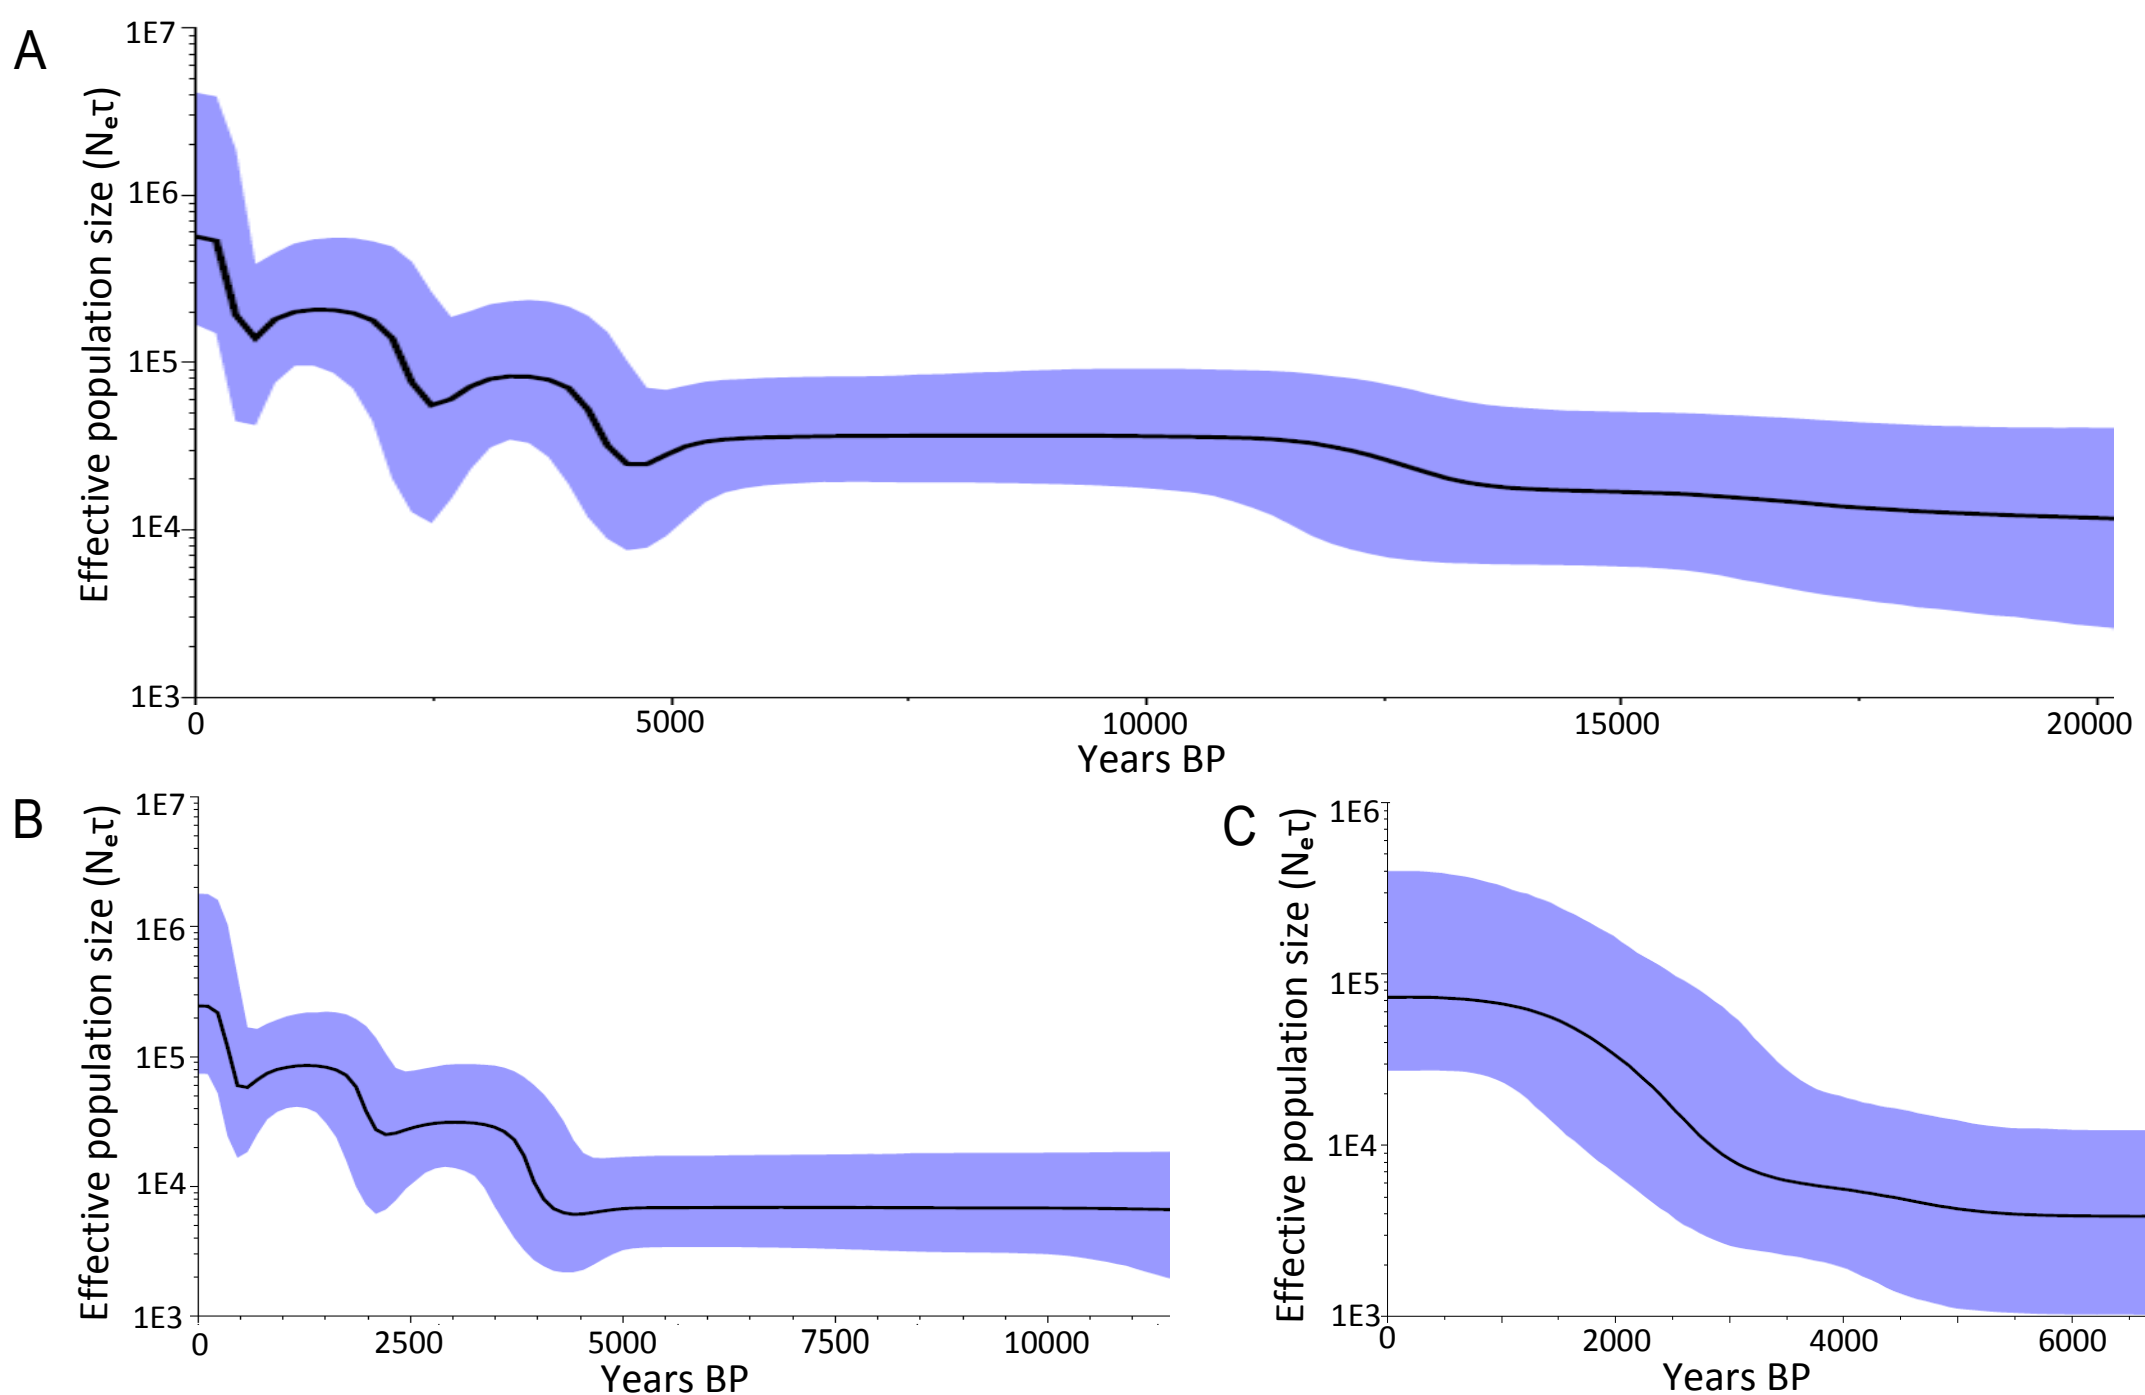

**Figure S6.** Bayesian Skyline Plots for Y-chromosome haplogroup N.

The BSPs show the variation of the effective population size through time for hg N (Panel A), N3 (Panel B) and N2a (Panel C). The BSPs were created using a piecewise-linear coalescence model and sequence data of chromosome Y. The y-axis is equal to  $N_e\tau$  (the product of the effective population size and the generation length in years). The thick black line is the median estimate, and the blue area shows the 95% highest posterior density (HPD) limits

**Table S1. List of high coverage samples and their geographic affiliations**

|    | Population      | Country of origin | Region of origin    | Haplogroup | latitude | longitude | Sequence ID     | Source               |
|----|-----------------|-------------------|---------------------|------------|----------|-----------|-----------------|----------------------|
| 1  | Karelian        | Russia            | Northeastern Europe | N3a4       | 63,1146  | 33,0139   | GS000035149-ASM | (Karmin et al. 2015) |
| 2  | North-Russian   | Russia            | Northeastern Europe | N3a3       | 64,7026  | 43,3933   | GS000014416-ASM | (Karmin et al. 2015) |
| 3  | Saami           | Norway            | Northeastern Europe | N3a3       | 69,8850  | 25,1917   | GS000035024-ASM | (Karmin et al. 2015) |
| 4  | Saami           | Norway            | Northeastern Europe | N3a3       | 69,8850  | 25,1917   | GS000035025-ASM | (Karmin et al. 2015) |
| 5  | Vepsa           | Russia            | Northeastern Europe | N2a1       | 61,2588  | 35,5441   | GS000035244-ASM | (Karmin et al. 2015) |
| 6  | Vepsa           | Russia            | Northeastern Europe | N3a4       | 61,4493  | 34,8212   | GS000016971-ASM | (Karmin et al. 2015) |
| 7  | Kuban-Cossack   | Russia            | Eastern Europe      | N3a4       | 45,0114  | 38,7323   | GS000016186-ASM | (Karmin et al. 2015) |
| 8  | Estonian        | Estonia           | Eastern Europe      | N3a3       | 59,1400  | 24,5400   | GS000015180-ASM | (Karmin et al. 2015) |
| 9  | Estonian        | Estonia           | Eastern Europe      | N3a3       | 58,2100  | 26,2100   | GS000015228-ASM | (Karmin et al. 2015) |
| 10 | Estonian        | Estonia           | Eastern Europe      | N3a3       | 58,9536  | 22,8365   | GS000017208-ASM | (Karmin et al. 2015) |
| 11 | Estonian        | Estonia           | Eastern Europe      | N3a3       | 57,7301  | 26,9168   | GS000017210-ASM | (Karmin et al. 2015) |
| 12 | Estonian        | Estonia           | Eastern Europe      | N3a3       | 58,0930  | 25,1815   | GS000017214-ASM | (Karmin et al. 2015) |
| 13 | Estonian        | Estonia           | Eastern Europe      | N3a4       | 59,2415  | 27,4885   | GS000017380-ASM | (Karmin et al. 2015) |
| 14 | Latvian         | Latvia            | Eastern Europe      | N3a3       | 56,8910  | 24,5078   | GS000035027-ASM | (Karmin et al. 2015) |
| 15 | Latvian         | Latvia            | Eastern Europe      | N3a3       | 56,6234  | 23,2828   | GS000035148-ASM | (Karmin et al. 2015) |
| 16 | Central-Russian | Russia            | Eastern Europe      | N3a3       | 57,8208  | 28,3365   | GS000016819-ASM | (Karmin et al. 2015) |
| 17 | Bashkir         | Russia            | Volga-Uralic region | N3a4       | 54,4500  | 55,1300   | GRC15559008     | This study           |
| 18 | Bashkir         | Russia            | Volga-Uralic region | N3a4       | 54,0600  | 53,5100   | GRC15559009     | This study           |
| 19 | Bashkir         | Russia            | Volga-Uralic region | N3a4       | 54,4500  | 55,1300   | GRC15559010     | This study           |
| 20 | Bashkir         | Russia            | Volga-Uralic region | N3a4       | 52,5800  | 58,0300   | GRC15559011     | This study           |
| 21 | Bashkir         | Russia            | Volga-Uralic region | N3a4       | 56,0400  | 54,4900   | GRC15559012     | This study           |
| 22 | Mari            | Russia            | Volga-Uralic region | N2a1       | 55,4692  | 56,0898   | GS000014332-ASM | (Karmin et al. 2015) |
| 23 | Mari            | Russia            | Volga-Uralic region | N3a1       | 55,4435  | 55,9757   | GS000014331-ASM | (Karmin et al. 2015) |
| 24 | Mari            | Russia            | Volga-Uralic region | N3a1       | 55,4435  | 55,9757   | GS000015715-ASM | (Karmin et al. 2015) |
| 25 | Tatar           | Russia            | Volga-Uralic region | N3a4       | 55,0500  | 52,4600   | GRC15559013     | This study           |
| 26 | Tatar           | Russia            | Volga-Uralic region | N3a4       | 54,4500  | 53,0100   | GRC15559014     | This study           |
| 27 | Tatar           | Russia            | Volga-Uralic region | N3a4       | 56,0900  | 50,1100   | GRC15559015     | This study           |
| 28 | Udmurd          | Russia            | Volga-Uralic region | N2a1       | 57,2969  | 52,7563   | GS000035432-ASM | (Karmin et al. 2015) |
| 29 | Udmurd          | Russia            | Volga-Uralic region | N3a1       | 57,2733  | 54,0578   | GS000013694-ASM | (Karmin et al. 2015) |
| 30 | Udmurd          | Russia            | Volga-Uralic region | N3a1       | 57,2969  | 52,7563   | GS000035017-ASM | (Karmin et al. 2015) |
| 31 | Khant           | Russia            | Western Siberia     | N2a1       | 63,4800  | 67,3900   | GRC15491804     | This study           |

|    |               |        |                          |       |         |          |                 |                      |
|----|---------------|--------|--------------------------|-------|---------|----------|-----------------|----------------------|
| 32 | Forest-Nenets | Russia | Western Siberia          | N2a1  | 64,9202 | 77,7779  | GS000015879-ASM | (Karmin et al. 2015) |
| 33 | Tundra-Nenets | Russia | Western Siberia          | N2a1  | 67,0045 | 78,2216  | GS000016162-ASM | (Karmin et al. 2015) |
| 34 | Tundra-Nenets | Russia | Western Siberia          | N2a1  | 67,0045 | 78,2216  | GS000016163-ASM | (Karmin et al. 2015) |
| 35 | Even          | Russia | Central Siberia          | N2a1  | 62,6615 | 135,5425 | GS000016167-ASM | (Karmin et al. 2015) |
| 36 | Even          | Russia | Central Siberia          | N3a2  | 63,2568 | 143,2094 | GS000016166-ASM | (Karmin et al. 2015) |
| 37 | Evenk         | Russia | Central Siberia          | N2a1  | 63,5954 | 103,9512 | GS000020108-ASM | (Karmin et al. 2015) |
| 38 | Yakut         | Russia | Central Siberia          | N2a1  | 65,7612 | 105,3406 | GS000022441-ASM | (Karmin et al. 2015) |
| 39 | Yakut         | Russia | Central Siberia          | N3a2  | 62,3496 | 131,9678 | GS000014333-ASM | (Karmin et al. 2015) |
| 40 | Yakut         | Russia | Central Siberia          | N3a2  | 68,5162 | 102,1610 | GS000020490-ASM | (Karmin et al. 2015) |
| 41 | Chukchi       | Russia | Eastern Siberia          | N3a5b | 64,7337 | 177,4916 | GS000020001-ASM | (Karmin et al. 2015) |
| 42 | Chukchi       | Russia | Eastern Siberia          | N3a5b | 64,7337 | 177,4916 | GS000020002-ASM | (Karmin et al. 2015) |
| 43 | Eskimo        | Russia | Eastern Siberia          | N3a5b | 64,5041 | 172,8773 | GS000019998-ASM | (Karmin et al. 2015) |
| 44 | Even          | Russia | Eastern Siberia          | N3a3  | 59,6727 | 150,1240 | GS000020110-ASM | (Karmin et al. 2015) |
| 45 | Koryak        | Russia | Eastern Siberia          | N3a5b | 61,9661 | 160,3686 | GS000022068-ASM | (Karmin et al. 2015) |
| 46 | Koryak        | Russia | Eastern Siberia          | N3a5b | 61,9661 | 160,3686 | GS000022069-ASM | (Karmin et al. 2015) |
| 47 | Koryak        | Russia | Eastern Siberia          | N3a5b | 61,9383 | 159,2329 | GS000033948-ASM | (Karmin et al. 2015) |
| 48 | Nanai         | Russia | Eastern Siberia          | N3a6  | 49,3600 | 136,3600 | GRC14392027     | This study           |
| 49 | Nanai         | Russia | Eastern Siberia          | N3a6  | 49,3600 | 136,3600 | GRC14392028     | This study           |
| 50 | Nanai         | Russia | Eastern Siberia          | N3a6  | 51,1200 | 138,1800 | GRC14392029     | This study           |
| 51 | Nanai         | Russia | Eastern Siberia          | N3a6  | 51,1200 | 138,1800 | GRC14392030     | This study           |
| 52 | Nanai         | Russia | Eastern Siberia          | N3a6  | 51,1200 | 138,1800 | GRC14392032     | This study           |
| 53 | Yakut         | Russia | Eastern Siberia          | N3a2  | 62,9310 | 152,3849 | GS000022076-ASM | (Karmin et al. 2015) |
| 54 | Altaiian      | Russia | Southern Siberia         | N3b   | 51,2200 | 87,1600  | GRC14392020     | This study           |
| 55 | Khakas        | Russia | Southern Siberia         | N3b   | 54,0200 | 89,3600  | GRC14392078     | This study           |
| 56 | Khakas        | Russia | Southern Siberia         | N3b   | 53,2900 | 91,2100  | GRC14392079     | This study           |
| 57 | Khakas        | Russia | Southern Siberia         | N3b   | 54,0300 | 90,2200  | GRC14392081     | This study           |
| 58 | Khakas        | Russia | Southern Siberia         | N3b   | 53,0300 | 90,2700  | GRC15491805     | This study           |
| 59 | Khakas        | Russia | Southern Siberia         | N3b   | 53,0300 | 90,2700  | GRC15491806     | This study           |
| 60 | Shor          | Russia | Southern Siberia         | N3b   | 53,1100 | 88,0800  | GRC14392123     | This study           |
| 61 | Shor          | Russia | Southern Siberia         | N3b   | 52,7797 | 87,8641  | GS000022438-ASM | (Karmin et al. 2015) |
| 62 | Tuvinian      | Russia | Southern Siberia         | N2a1  | 51,4728 | 92,8482  | GS000016968-ASM | (Karmin et al. 2015) |
| 63 | Tuvinian      | Russia | Southern Siberia         | N2a1  | 51,1621 | 89,4727  | GS000017247-ASM | (Karmin et al. 2015) |
| 64 | Tuvinian      | Russia | Southern Siberia         | N3b   | 51,2400 | 92,3600  | GRC14392134     | This study           |
| 65 | Buryat        | Russia | Mongolia and Transbaikal | N3a5a | 56,2678 | 112,9980 | GS000020491-ASM | (Karmin et al. 2015) |



|    |              |             |                                    |       |         |          |                    |                      |
|----|--------------|-------------|------------------------------------|-------|---------|----------|--------------------|----------------------|
| 66 | Buryat       | Russia      | Mongolia and Transbaikal           | N3a5a | 56,2678 | 112,9980 | GS000022077-ASM    | (Karmin et al. 2015) |
| 67 | Mongol       | Mongolia    | Mongolia and Transbaikal           | N2a1  | 47,9090 | 100,8215 | GS000035235-ASM    | (Karmin et al. 2015) |
| 68 | Mongol       | Mongolia    | Mongolia and Transbaikal           | N3a5a | 45,7148 | 106,2927 | GS000016190-ASM    | (Karmin et al. 2015) |
| 69 | Mongol       | Mongolia    | Mongolia and Transbaikal           | N3a5a | 43,5485 | 104,2822 | GS000035116-ASM    | (Karmin et al. 2015) |
| 70 | Mongol       | Mongolia    | Mongolia and Transbaikal           | N3a5a | 49,9971 | 106,5070 | GS000035236-ASM    | (Karmin et al. 2015) |
| 71 | Afgan        | Afghanistan | Central Asia, Caucasus & West Asia | N2a1  | 34,2400 | 69,1700  | GRC14325559        | This study           |
| 72 | Arabic       | unknown     | Central Asia, Caucasus & West Asia | N2a1  | .       | .        | GRC13280752        | This study           |
| 73 | Kazakh       | Kazakhstan  | Central Asia, Caucasus & West Asia | N3a5a | 51,1242 | 71,5430  | GS000035127-ASM    | (Karmin et al. 2015) |
| 74 | Lebanese     | Lebanon     | Central Asia, Caucasus & West Asia | N3a2  | 33,8430 | 35,6177  | GS000017169-ASM    | (Karmin et al. 2015) |
| 75 | Turkish      | Turkey      | Central Asia, Caucasus & West Asia | N2a1  | 38,3100 | 29,0900  | GRC13275955        | This study           |
| 76 | Turkish      | Turkey      | Central Asia, Caucasus & West Asia | N3a5a | 39,3500 | 32,5800  | GRC13187499        | This study           |
| 77 | Chinese      | China       | East Asia                          | N2a2  | 41,4100 | 124,0100 | GRC14389432        | This study           |
| 78 | Chinese      | China       | East Asia                          | N3a2  | 34,4100 | 109,2500 | GRC12129455        | This study           |
| 79 | Chinese      | China       | East Asia                          | N4a   | 31,5500 | 105,4500 | GRC13188948        | This study           |
| 80 | Chinese      | China       | East Asia                          | N4a   | 28,4400 | 105,2500 | GRC13227636        | This study           |
| 81 | Chinese      | China       | East Asia                          | N4a   | 39,4600 | 116,1800 | NA18558-200-37-ASM | (Karmin et al. 2015) |
| 82 | Chinese      | China       | East Asia                          | N4b   | 34,3500 | 112,3000 | GRC12126040        | This study           |
| 83 | Chinese      | China       | East Asia                          | N4b   | 29,5100 | 107,0300 | GRC12135043        | This study           |
| 84 | Chinese      | China       | East Asia                          | N4b   | 38,5300 | 115,5300 | GRC13181491        | This study           |
| 85 | Chinese      | China       | East Asia                          | N4b   | 27,5600 | 116,3600 | GRC13211524        | This study           |
| 86 | Chinese      | China       | East Asia                          | N4b   | 38,2100 | 106,3000 | GRC13248198        | This study           |
| 87 | Chinese      | China       | East Asia                          | N4b   | 31,1100 | 111,1700 | GRC13277996        | This study           |
| 88 | Chinese      | China       | East Asia                          | N4b   | 22,2400 | 110,1600 | GRC14355778        | This study           |
| 89 | Japanese     | Japan       | East Asia                          | N2a2  | 35,4800 | 139,3000 | GRC12126890        | This study           |
| 90 | Japanese     | Japan       | East Asia                          | N3c   | 35,0300 | 137,4100 | GRC13176739        | This study           |
| 91 | Japanese     | Japan       | East Asia                          | N3c   | 43,2400 | 142,2600 | GRC13271735        | This study           |
| 92 | Japanese     | Japan       | East Asia                          | N4b   | 42,5500 | 141,4800 | GRC13277459        | This study           |
| 93 | Vietnamese   | Vietnam     | East Asia                          | N2a2  | 11,0100 | 106,5500 | GRC13193880        | This study           |
| 94 | Mixed origin | unknown     | unknown                            | N5    | .       | .        | GRC13294033        | This study           |
| 95 | Lebbo        | Indonesia   | Southeast Asia                     | O2a2  | 1,6553  | 117,1572 | GS000017007-ASM    | (Karmin et al. 2015) |
| 96 | Murut        | Brunei      | Southeast Asia                     | O1c   | 4,6204  | 115,1415 | GS000019985-ASM    | (Karmin et al. 2015) |
| 97 | Burmese      | Myanmar     | East Asia                          | O3a1  | 19,7361 | 96,2089  | GS000019901-ASM    | (Karmin et al. 2015) |

**Table S3. Specifications for SNPs used to genotype population samples (unless otherwise indicated).**

| SNP Position Build37 | Marker name                | Clade      | Forward Primer 5' → 3'      | Reverse Primer 5' → 3'    | Product Length (bp) | SNP Position Product | Ancestral | Derived |
|----------------------|----------------------------|------------|-----------------------------|---------------------------|---------------------|----------------------|-----------|---------|
| 2880546              | B202                       | N3a5-B202  | AGTTTAGTATTTTATGGCTGCAAC    | GATTTATTCTGAGCTGATTTTCTG  | 299                 | 146                  | T         | C       |
| 21978781             | B479                       | N3a6       | GACAGGGTCTTATCATTAAACAC     | GTCTTCTTTTCAGTCTCATGTTG   | 462                 | 221                  | C         | A       |
| 7870037              | B523_eq <sup>1</sup>       | N2a1       | ACCTGACAAACTTTAAGAGAAGAAA   | CCCCAGAGAACATTTTGAAATATCA | 294                 | 158                  | T         | G       |
| 7207924              | B478                       | N2a1-B478  | CAAGAGCAAGGTCTAGTGTA        | ACTCTCTACCCTCTGCAAAA      | 212                 | 121                  | T         | A       |
| 21843827**           | B478_eq (P63)*             | N2a1-B478  | GTCCTATATCTGAAACCAAAGC      | GCAGAATTACCATCCTTAACAAG   | 399                 | 207                  | A         | G       |
| 7926029              | B524                       | N2a1-B524  | CATTGATGTTTTCTCTAGGCTTG     | ATTGACTACAGGATCTCAATATGAA | 397                 | 224                  | C         | A       |
| 21977460             | B525                       | N2a1-B525  | ATACTGTCTCATTTGCTCCCTCTAT   | CTTTGTAAACCCTCCCTTGATTA   | 460                 | 213                  | C         | A       |
| 16041509             | B528                       | N2a1-B528  | CTGTTTCTATTTCTATTTTCGGGT    | GAAGCTACTATTGTTTGTTCGAG   | 385                 | 231                  | C         | T       |
| 14001197             | B187                       | N3b        | AGTAACACAAAGTAATACAAAGCAG   | AGCTCAATTATCCAGTTTTAAGA   | 347                 | 159                  | C         | T       |
| 14570424             | VL29(CTS2929) <sup>1</sup> | N3a3       | TGGACATATACCCCACT           | GATTGGGGAAAAGTTGGTCA      | 228                 | 106                  | T         | C       |
| 14827819             | B197 <sup>1</sup>          | N3a5-B197  | TTATAACTGTTCTTGGCGTAGATT    | TATGATGTTTGAAGACAGTGAAAT  | 382                 | 141                  | T         | C       |
| 17090704             | B211 <sup>1</sup>          | N3a1       | TGTTTCTAGTTGCCCTGATG        | AGATGACAGACGGACCTTAA      | 196                 | 166                  | G         | A       |
| 17216441             | CTS6967(L392_eq)           | N3a3'6     | AGAGTGTGTTTCTTTACTGCT       | GACACAGGAAGCATGACAA       | 195                 | 97                   | G         | C       |
| 18973691             | L1419_eq <sup>1</sup>      | N2a1-L1419 | ATTATGTCTGCGTTGTCTTATTGAA   | GAGACTCAAGCCTGTAATTTTGAA  | 391                 | 163                  | A         | T       |
| 19282064             | F4205                      | N3a5-F4205 | AACTTATGCTGAAGTGAAGATG      | GCACCCTAACCAATCCCTTG      | 240                 | 120                  | G         | A       |
| 21463326             | Z1936                      | N3a4       | CTAAACTCGTCCCTCAGTCA        | GCTTAACTCTGCCTGACTTC      | 232                 | 150                  | C         | T       |
| 22762208             | M2110 (CTS10761)           | N3a2'6     | AAGAAACCTAAGAAAGCCTGC       | ATGTAAGAACGTGCTATCTG      | 248                 | 142                  | T         | A       |
| 23259624             | M2118                      | N3a2       | CCTCTCACTAGCAAAGAACC        | CCATGGTACTCTGTTTTCTCA     | 187                 | 137                  | A         | G       |
| 19080602**           | F2930                      | N4         | CTGTA CTCTCCCTATAATTT CAGTA | CACAACACAGTCAGGAATTCTCA   | 400                 | 158                  | G         | A       |

\* Position 21843827 is indicated as marker P63 in ISOGG with insertion of C in this position, but sequencing confirmed A/G mutation in that position

\*\*marker not typed in the phylogeographic study

<sup>1</sup> the following markers used in the population survey results in TableS2 were typed but are not listed in Table S6 since they fall outside the 6.2 Mbp sequence length.

**Table S4. Datapoints from literature for frequency maps.**

| Sample points                   | References | LATITUDE | LONGITUDE |
|---------------------------------|------------|----------|-----------|
| POPULATIONS                     |            |          |           |
| Italians from South Apulia      | 1          | 39,89    | 18,34     |
| Italians from West Campania     | 1          | 41,07    | 14,71     |
| Saudi Arabians                  | 2          | 24,70    | 46,70     |
| Avars                           | 3          | 42,47    | 46,88     |
| Chechens (Chechnya)             | 3          | 43,20    | 45,98     |
| Chechens (Ingushetia)           | 3          | 43,20    | 45,20     |
| Darghins                        | 3          | 42,18    | 47,22     |
| Ingushes                        | 3          | 43,12    | 45,04     |
| Kubachins                       | 3          | 42,08    | 47,58     |
| Ossets Digora                   | 3          | 43,12    | 43,55     |
| Shapsugs                        | 3          | 44,15    | 39,12     |
| Croatians                       | 4          | 45,48    | 15,57     |
| Albanians                       | 5          | 41,19    | 19,49     |
| Bosnians                        | 5          | 43,85    | 18,42     |
| Greeks Macedonian               | 5          | 41,05    | 23,33     |
| Slovenians of Battaglia         | 5          | 46,03    | 14,30     |
| Norway                          | 6          | 59,90    | 10,80     |
| Denmark                         | 7          | 55,43    | 12,34     |
| UAE                             | 8          | 24,28    | 54,22     |
| Chinese Blang (Chine)           | 9          | 21,40    | 100,20    |
| Chinese Kimmun-Mountain (Chine) | 9          | 22,20    | 101,20    |
| Chinese Miao Guizhou (Chine)    | 9          | 26,50    | 108,30    |
| Chinese Miao Yunnan (Chine)     | 9          | 24,20    | 103,40    |
| Chinese Mien-N (Chine)          | 9          | 23,50    | 106,20    |
| Chinese Mien-Nativer (Chine)    | 9          | 24,00    | 111,40    |
| Chinese Mien-W (Chine)          | 9          | 22,50    | 101,50    |
| Chinese Pahng (Chine)           | 9          | 25,30    | 109,10    |
| Chinese She-N (Chine)           | 9          | 27,60    | 119,30    |
| Chinese Yao-Lowland (Chine)     | 9          | 24,50    | 110,50    |
| North-West Sicily               | 10         | 38,03    | 12,06     |
| Taiwan                          | 11         | 24,00    | 121,00    |
| Turks North-Eastern             | 12         | 40,80    | 38,60     |
| Turks North-Western             | 12         | 40,90    | 28,10     |
| Turks South-Eastern             | 12         | 37,50    | 39,10     |
| Hungarian                       | 13         | 46,63    | 20,27     |
| Kalmyks                         | 14         | 46,00    | 45,38     |
| Egypt                           | 15         | 30,00    | 31,25     |
| Syrians NE (Ar-Raqqah)          | 15         | 36,00    | 38,90     |
| Syrians NW (Aleppo)             | 15         | 36,20    | 37,60     |
| Tibet                           | 16         | 29,58    | 91,12     |
| Lebanese Maronite (Mount)       | 17         | 33,80    | 35,50     |
| Okinawa                         | 18         | 26,32    | 127,78    |
| Evenks (China)                  | 19         | 50,10    | 125,90    |
| Han Southern                    | 19         | 24,70    | 115,00    |
| Manchus                         | 19         | 44,20    | 126,90    |
| Miao                            | 19         | 28,20    | 107,30    |
| She                             | 19         | 22,80    | 110,30    |
| Tibetians                       | 19         | 33,30    | 86,70     |
| Tujians                         | 19         | 29,30    | 112,30    |
| Uygurs                          | 19         | 43,90    | 86,90     |
| Yao                             | 19         | 23,80    | 107,60    |
| Yizu                            | 19         | 26,50    | 100,50    |
| Miao                            | 19         | 26,00    | 113,00    |
| She                             | 19         | 22,00    | 111,50    |
| Tujia                           | 19         | 27,00    | 115,00    |
| Yao                             | 19         | 23,00    | 107,00    |
| Chinese Korean                  | 20         | 42,00    | 124,00    |
| Japanese                        | 20         | 35,70    | 139,70    |
| Manchurian                      | 20         | 43,90    | 125,20    |
| Germans (Freiburg i.Br.)        | 21         | 48,00    | 7,83      |
| Japanese (Yamaguchi)            | 18         | 34,10    | 131,50    |
| Greeks (Crete)                  | 22         | 35,23    | 25,83     |
| Greeks (Nea Nikomedia)          | 22         | 40,58    | 22,25     |
| French (Provence "Neolithic")   | 23         | 43,60    | 7,10      |
| Antwerpen                       | 24         | 51,24    | 4,68      |
| Iranians Muslim (Uromia)        | 25         | 37,60    | 45,10     |
| Czech (Brno)                    | 26         | 49,20    | 16,60     |
| Albanians Kosovar               | 27         | 42,70    | 21,20     |
| Dutch                           | 28         | 52,30    | 4,90      |
| Romanians                       | 28         | 44,40    | 26,10     |
| Sardinians                      | 29         | 40,00    | 9,00      |
| Kets                            | 30         | 63,20    | 87,00     |
| Etulia (Gagauz)                 | 31         | 45,31    | 28,27     |
| Tajiks (Samarkand)              | 32         | 39,60    | 67,60     |
| Uzbeks (Bukhara)                | 32         | 39,80    | 64,40     |
| Uzbeks (Fergana Valley)         | 32         | 40,60    | 71,00     |
| Yagnobs                         | 32         | 39,40    | 68,60     |

|                                 |    |       |        |
|---------------------------------|----|-------|--------|
| Buyei                           | 33 | 26,55 | 106,28 |
| Han (Chendu)                    | 33 | 30,70 | 104,05 |
| Han (MeiXian)                   | 33 | 34,30 | 107,55 |
| Hui                             | 33 | 36,98 | 105,92 |
| Li                              | 33 | 19,17 | 110,03 |
| Qiang                           | 33 | 31,97 | 102,30 |
| She                             | 33 | 29,27 | 121,40 |
| Tibetans                        | 33 | 29,45 | 90,48  |
| Yao (Bama)                      | 33 | 24,10 | 106,93 |
| Yao (Liannan)                   | 33 | 24,72 | 112,27 |
| Abazins (Stavropol province)    | 34 | 44,68 | 42,00  |
| Abkhazians (Georgia)            | 34 | 43,00 | 40,95  |
| Andis (Dagestan)                | 34 | 42,60 | 46,20  |
| Balkars (Kabardino-Balkaria)    | 34 | 43,33 | 43,33  |
| Dargins (Dagestan)              | 34 | 42,08 | 47,58  |
| Georgians (Georgia)             | 34 | 42,00 | 44,10  |
| Ingush (Ingushetia)             | 34 | 43,32 | 45,00  |
| Karachays (Karachay-Cherkessia) | 34 | 43,92 | 42,13  |
| Kumyks (Dagestan)               | 34 | 42,73 | 47,37  |
| Tabasarans (Dagestan)           | 34 | 42,00 | 47,67  |
| Cypriote                        | 35 | 35,10 | 33,50  |
| Maltese                         | 35 | 35,90 | 14,50  |
| Lebanese Shiite Muslim (South)  | 36 | 33,20 | 35,42  |
| Lebanese Sunnite Muslim (North) | 36 | 34,50 | 36,27  |
| Buyi (Guizhou)                  | 37 | 26,20 | 107,50 |
| Buyi (Guizhou)                  | 37 | 26,10 | 106,20 |
| Han (Guangdong)                 | 37 | 27,30 | 116,10 |
| Han (Jiangsu)                   | 37 | 34,50 | 119,10 |
| Han (Shannxi)                   | 37 | 34,10 | 108,90 |
| Hazak (Xingjiang)               | 37 | 43,50 | 82,10  |
| Jing (Guangxi)                  | 37 | 23,20 | 106,10 |
| She (Fujian)                    | 37 | 26,20 | 117,50 |
| Tibetan (Qinghai)               | 37 | 34,00 | 100,10 |
| Tibetan (Xizang)                | 37 | 29,90 | 89,50  |
| Yao (Guangxi)                   | 37 | 25,70 | 108,70 |

1. Capelli, C. et al. Y chromosome genetic variation in the Italian peninsula is clinal and supports an admixture model for the Mesolithic-Neolithic encounter. *Mol Phylogenet Evol* 44, 228-239, (2007).
2. Abu-Amero, K. K. et al. Saudi Arabian Y-Chromosome diversity and its relationship with nearby regions. *Bmc Genet* 10, (2009).
3. Balanovsky, O. et al. Parallel Evolution of Genes and Languages in the Caucasus Region. *Mol Biol Evol*, (2011).
4. Barac, L. et al. Y chromosomal heritage of Croatian population and its island isolates. *European Journal of Human Genetics* 11, 535-542, (2003).
5. Battaglia, V. et al. Y-chromosomal evidence of the cultural diffusion of agriculture in Southeast Europe. *Eur J Hum Genet* 17, 820-830, (2009).
6. Bosch, E. et al. High level of male-biased Scandinavian admixture in Greenlandic Inuit shown by Y-chromosomal analysis. *Human Genetics* 112, 353-363, (2003).
7. Brion, M. et al. A collaborative study of the EDNAP group regarding Y-chromosome binary polymorphism analysis. *Forensic Science International* 153, 103-108, (2005).
8. Cadenas, A. M., Zhivotovsky, L. A., Cavalli-Sforza, L. L., Underhill, P. A. & Herrera, R. J. Y-chromosome diversity characterizes the Gulf of Oman. *Eur J Hum Genet* 16, 374-386 (2008).
9. Cai, X. Y. et al. Human Migration through Bottlenecks from Southeast Asia into East Asia during Last Glacial Maximum Revealed by Y Chromosomes. *PLoS One* 6, e24282, (2011).
10. Capelli, C. et al. Population structure in the Mediterranean basin: A Y chromosome perspective. *Annals of Human Genetics* 70, 207-225, (2006).
11. Kayser, M. et al. Melanesian and asian origins of Polynesians: mtDNA and Y chromosome gradients across the Pacific. *Molecular Biology and Evolution* 23, 2234-2244, (2006).
12. Cinnioglu, C. et al. Excavating Y-chromosome haplotype strata in Anatolia. *Hum Genet* 114, 127-148 (2004).
13. Csanyi, B. et al. Y-chromosome analysis of ancient Hungarian and two modern Hungarian-speaking populations from the Carpathian Basin. *Annals of Human Genetics* 72, 519-534, (2008).
14. Derenko, M. et al. Contrasting patterns of Y-chromosome variation in south Siberian populations from Baikal and Altai-Sayan regions. *Human Genetics* 118, 591-604, (2006).
15. El-Sibai, M. et al. Geographical Structure of the Y-chromosomal Genetic Landscape of the Levant: A coastal-inland contrast. *Annals of Human Genetics* 73, 568-581, (2009).
16. Gayden, T. et al. The Himalayas as a directional barrier to gene flow. *American Journal of Human Genetics* 80, 884-894, (2007).
17. Haber, M. et al. Influences of history, geography, and religion on genetic structure: the Maronites in Lebanon. *European Journal of Human Genetics* 19, 334-340, (2011).
18. Hammer, M. F. et al. Dual origins of the Japanese: common ground for hunter-gatherer and farmer Y chromosomes. *J Hum Genet* 51, 47-58 (2006).
19. Karafet, T. et al. Paternal population history of east Asia: Sources, patterns, and microevolutionary processes. *American Journal of Human Genetics* 69, 615-628, (2001).
20. Katoh, T. et al. Genetic features of Mongolian ethnic groups revealed by Y-chromosomal analysis. *Gene* 346, 63-70, (2005).
21. Kayser, M. et al. Significant genetic differentiation between Poland and Germany follows present-day political borders, as revealed by Y-chromosome analysis. *Hum Gen* 117, 428-443, (2005).
22. King, R. J. et al. Differential Y-chromosome Anatolian influences on the Greek and Cretan Neolithic. *Ann Hum Genet* 72, 205-214 (2008).
- 23 King, R. J. et al. The coming of the Greeks to Provence and Corsica: Y-chromosome models of archaic Greek colonization of the western Mediterranean. *BMCEvolBio*11,69, (2011).
24. Larmuseau, M. H. D. et al. Temporal differentiation across a West-European Y-chromosomal cline: genealogy as a tool in human population genetics. *European Journal of Human Genetics* 20, 434-440, (2012).
25. Lashgary, Z. et al. Y chromosome diversity among the Iranian religious groups: A reservoir of genetic variation. *Ann Hum Biol* 38, 364-371, (2011).
26. Luca, F. et al. Y-chromosomal variation in the Czech Republic. *Am J Phys Anthropol* 132, 132-139, (2007).
27. Pericic, M. et al. High-resolution phylogenetic analysis of southeastern Europe traces major episodes of paternal gene flow among slavic populations. *MBE* 22, 1964-1975, (2005).
28. Rosser, Z. H. et al. Y-chromosomal diversity in Europe is clinal and influenced primarily by geography, rather than by language. *Am J Hum Genet* 67, 1526-1543 (2000).
29. Semino, O. et al. The genetic legacy of Paleolithic Homo sapiens sapiens in extant Europeans: a Y chromosome perspective. *Science* 290, 1155-1159 (2000).
30. Karafet, T. M. et al. High levels of Y-chromosome differentiation among native Siberian populations and the genetic signature of a boreal hunter-gatherer way of life. *Hum Biol* 74, 761-789 (2002).
31. Varzari, A. et al. Searching for the Origin of Gagauzes: Inferences from Y-Chromosome Analysis. *Am J Hum Biol* 21, 326-336, (2009).
32. Wells, R. S. et al. The Eurasian heartland: a continental perspective on Y-chromosome diversity. *Proc Natl Acad Sci U S A* 98, 10244-10249 (2001).
33. Xue, Y. L. et al. Male demography in East Asia: A north-south contrast in human population expansion times. *Genetics* 172, 2431-2439, (2006).
34. Yunusbayev, B. et al. The Caucasus as an Asymmetric Semipermeable Barrier to Ancient Human Migrations. *Mol Biol Evol*, (2011).
35. Zalloua, P. A. et al. Identifying Genetic Traces of Historical Expansions: Phoenician Footprints in the Mediterranean. *American Journal of Human Genetics* 83, 633-642, (2008).
36. Zalloua, P. A. et al. Y-chromosomal diversity in Lebanon is structured by recent historical events. *Am J Hum Genet* 82, 873-882 (2008).
37. Zhong, H. et al. Extended Y Chromosome Investigation Suggests Postglacial Migrations of Modern Humans into East Asia via the Northern Route. *MBE* 28, 717-727, (2011).

Table S5. Age estimates of hg N clades reported in Figure S1

| No | Name                 | Post | Age    | Lower <sup>a</sup> | Upper <sup>a</sup> | Lower <sup>b</sup> | Upper <sup>b</sup> |
|----|----------------------|------|--------|--------------------|--------------------|--------------------|--------------------|
| 1  | NO calibration point | 1.00 | 41,900 |                    |                    | 40,175             | 43,591             |
| 2  | N                    | 1.00 | 25,313 | 22,764             | 27,934             | 21,722             | 28,956             |
| 3  | N2'4                 | 1.00 | 19,937 | 17,954             | 21,988             | 17,134             | 22,793             |
| 4  | N2'3                 | 1.00 | 17,621 | 15,677             | 19,570             | 14,952             | 20,282             |
| 5  | N3                   | 1.00 | 12,989 | 11,336             | 14,648             | 10,802             | 15,173             |
| 6  | N3a'b                | 1.00 | 11,914 | 10,365             | 13,579             | 9,875              | 14,060             |
| 7  | N3a                  | 1.00 | 8,395  | 7,126              | 9,658              | 6,781              | 9,997              |
| 8  | N3a2'6               | 1.00 | 7,113  | 6,076              | 8,252              | 5,783              | 8,539              |
| 9  | N3a3'6               | 1.00 | 4,995  | 4,353              | 5,700              | 4,147              | 5,902              |
| 10 |                      | 0.26 | 4,848  | 4,208              | 5,477              | 4,009              | 5,673              |
| 11 |                      | 0.28 | 4,714  | 4,119              | 5,417              | 3,925              | 5,607              |
| 12 | N3a3                 | 1.00 | 4,480  | 3,816              | 5,156              | 3,632              | 5,337              |
| 13 |                      | 0.99 | 4,177  | 3,484              | 4,857              | 3,312              | 5,026              |
| 14 |                      | 1.00 | 2,887  | 2,282              | 3,624              | 2,163              | 3,741              |
| 15 |                      | 1.00 | 2,530  | 2,024              | 3,067              | 1,920              | 3,169              |
| 16 |                      | 0.22 | 2,426  | 1,971              | 2,957              | 1,871              | 3,055              |
| 17 |                      | 0.13 | 2,338  | 1,817              | 2,873              | 1,721              | 2,967              |
| 18 |                      | 0.25 | 2,173  | 1,476              | 2,758              | 1,387              | 2,846              |
| 19 |                      | 0.48 | 2,595  | 2,004              | 3,278              | 1,897              | 3,383              |
| 20 |                      | 1.00 | 2,466  | 1,954              | 3,038              | 1,853              | 3,138              |
| 21 |                      | 0.40 | 2,339  | 1,769              | 2,863              | 1,673              | 2,957              |
| 22 |                      | 1.00 | 1,486  | 818                | 2,173              | 757                | 2,233              |
| 23 | N3a6                 | 1.00 | 4,217  | 3,359              | 5,004              | 3,185              | 5,174              |
| 24 |                      | 1.00 | 1,006  | 530                | 1,633              | 489                | 1,674              |
| 25 |                      | 1.00 | 589    | 271                | 1,004              | 247                | 1,028              |
| 26 |                      | 1.00 | 826    | 332                | 1,544              | 298                | 1,577              |
| 27 | N3a5                 | 0.99 | 4,580  | 3,943              | 5,284              | 3,755              | 5,469              |
| 28 |                      | 1.00 | 2,774  | 2,226              | 3,415              | 2,112              | 3,527              |
| 29 |                      | 1.00 | 2,328  | 1,798              | 2,842              | 1,702              | 2,936              |
| 30 |                      | 0.22 | 2,230  | 1,684              | 2,750              | 1,592              | 2,840              |
| 31 |                      | 0.23 | 2,159  | 1,566              | 2,685              | 1,477              | 2,772              |
| 32 |                      | 1.00 | 1,602  | 1,019              | 2,252              | 953                | 2,317              |
| 33 |                      | 1.00 | 498    | 182                | 872                | 162                | 892                |
| 34 |                      | 1.00 | 2,423  | 1,825              | 3,118              | 1,725              | 3,216              |
| 35 |                      | 1.00 | 862    | 470                | 1,370              | 435                | 1,405              |
| 36 |                      | 0.99 | 589    | 324                | 951                | 300                | 975                |
| 37 |                      | 0.35 | 487    | 227                | 780                | 207                | 800                |
| 38 |                      | 1.00 | 465    | 153                | 801                | 134                | 820                |
| 39 | N3a4                 | 1.00 | 4,476  | 3,790              | 5,156              | 3,606              | 5,337              |
| 40 |                      | 1.00 | 4,027  | 3,197              | 4,762              | 3,031              | 4,925              |
| 41 |                      | 0.99 | 3,542  | 2,586              | 4,391              | 2,440              | 4,534              |
| 42 |                      | 1.00 | 2,102  | 1,313              | 2,709              | 1,227              | 2,794              |
| 43 |                      | 1.00 | 1,955  | 1,211              | 2,584              | 1,131              | 2,663              |
| 44 |                      | 1.00 | 428    | 107                | 754                | 89                 | 771                |
| 45 |                      | 1.00 | 3,860  | 3,073              | 4,629              | 2,914              | 4,785              |
| 46 |                      | 1.00 | 526    | 206                | 893                | 184                | 914                |
| 47 |                      | 0.56 | 328    | 25                 | 618                | 12                 | 631                |
| 48 |                      | 1.00 | 2,461  | 1,836              | 3,122              | 1,735              | 3,221              |
| 49 |                      | 1.00 | 886    | 419                | 1,487              | 383                | 1,523              |
| 50 | N3a2                 | 1.00 | 4,490  | 3,594              | 5,394              | 3,409              | 5,575              |
| 51 |                      | 1.00 | 1,737  | 990                | 2,539              | 919                | 2,609              |
| 52 |                      | 1.00 | 653    | 338                | 1,103              | 311                | 1,129              |
| 53 |                      | 0.43 | 506    | 213                | 855                | 192                | 875                |
| 54 |                      | 0.96 | 4,170  | 3,206              | 5,052              | 3,034              | 5,220              |

|    |      |      |        |        |        |        |        |
|----|------|------|--------|--------|--------|--------|--------|
| 55 | N3a1 | 1.00 | 4,325  | 3,263  | 5,285  | 3,085  | 5,460  |
| 56 |      | 1.00 | 1,972  | 1,18   | 2,701  | 1,099  | 2,781  |
| 57 |      | 1.00 | 1,211  | 561    | 1,952  | 511    | 2,001  |
| 58 | N3b  | 1.00 | 2,051  | 1,301  | 2,664  | 1,217  | 2,747  |
| 59 |      | 1.00 | 1,149  | 705    | 1,657  | 658    | 1,703  |
| 60 |      | 1.00 | 615    | 352    | 927    | 327    | 952    |
| 61 |      | 0.21 | 527    | 262    | 794    | 240    | 815    |
| 62 |      | 0.59 | 347    | 91     | 596    | 77     | 610    |
| 63 |      | 0.20 | 392    | 96     | 645    | 80     | 661    |
| 64 |      | 1.00 | 688    | 354    | 1,138  | 326    | 1,166  |
| 65 |      | 0.58 | 1,627  | 901    | 2,491  | 834    | 2,557  |
| 66 | N3c  | 1.00 | 2,807  | 1,999  | 4,114  | 1,884  | 4,227  |
| 67 | N2a  | 1.00 | 9,314  | 7,802  | 10,888 | 7,419  | 11,264 |
| 68 | N2a1 | 1.00 | 4,727  | 4,018  | 5,502  | 3,824  | 5,693  |
| 69 |      | 0.99 | 4,391  | 3,720  | 5,109  | 3,539  | 5,286  |
| 70 |      | 1.00 | 3,007  | 2,295  | 3,849  | 2,171  | 3,970  |
| 71 |      | 0.52 | 2,706  | 2,12   | 3,500  | 2,009  | 3,609  |
| 72 |      | 1.00 | 1,819  | 1,142  | 2,514  | 1,067  | 2,587  |
| 73 |      | 1.00 | 567    | 244    | 1,019  | 221    | 1,042  |
| 74 |      | 0.27 | 2,515  | 1,951  | 3,229  | 1,848  | 3,331  |
| 75 |      | 1.00 | 1,130  | 481    | 1,922  | 435    | 1,968  |
| 76 |      | 1.00 | 1,652  | 1,049  | 2,367  | 981    | 2,434  |
| 77 |      | 1.00 | 1,378  | 834    | 2,088  | 777    | 2,144  |
| 78 |      | 1.00 | 2,491  | 1,947  | 3,113  | 1,845  | 3,214  |
| 79 |      | 0.70 | 2,174  | 1,355  | 2,812  | 1,266  | 2,900  |
| 80 |      | 0.43 | 4,523  | 3,846  | 5,266  | 3,660  | 5,449  |
| 81 |      | 1.00 | 2,678  | 2,012  | 3,615  | 1,902  | 3,723  |
| 82 |      | 1.00 | 2,707  | 2,034  | 3,595  | 1,923  | 3,704  |
| 83 | N2a2 | 1.00 | 4,909  | 3,864  | 6,158  | 3,662  | 6,356  |
| 84 |      | 1.00 | 3,462  | 2,438  | 4,624  | 2,296  | 4,764  |
| 85 | N4   | 1.00 | 16,220 | 14,400 | 18,196 | 13,733 | 18,851 |
| 86 | N4b  | 1.00 | 7,162  | 6,041  | 8,363  | 5,746  | 8,652  |
| 87 |      | 1.00 | 6,437  | 5,419  | 7,574  | 5,154  | 7,834  |
| 88 |      | 1.00 | 5,631  | 4,575  | 6,740  | 4,343  | 6,967  |
| 89 |      | 1.00 | 2,606  | 2,016  | 3,282  | 1,909  | 3,387  |
| 90 |      | 0.34 | 2,475  | 1,951  | 3,123  | 1,849  | 3,223  |
| 91 |      | 1.00 | 4,694  | 3,778  | 5,729  | 3,585  | 5,919  |
| 92 |      | 0.39 | 6,919  | 5,841  | 8,174  | 5,556  | 8,453  |
| 93 | N4a  | 1.00 | 12,726 | 11,042 | 14,685 | 10,518 | 15,199 |
| 94 |      | 0.32 | 12,530 | 10,802 | 14,496 | 10,286 | 15,002 |

No - node number,

Name - node name,

Post - posterior support to the clade,

Age - average age estimate (years),

Lower - lower 95% boundary, Upper - upper 95% boundary of the age estimate,

a - considering only the variance of branch length estimation in BEAST,

b - considering the uncertainty from the confidence intervals of the calibration point age 40,175 - 43,591.
